# Supplementary material for: Identifying subtypes of heart failure with machine learning: external, prognostic and genetic validation in three electronic health record sources with 320,863 individuals
Source: medRxiv preprint, doi:10.1101/2022.06.27.22276961, version 1 (2022-06-28)
Supplement: Supplementary methods, tables and figures [file 276961_file02.docx]

**Web Appendix**

| **Contents** | **Page number** |
| --- | --- |
| Web Figure 1 Deduplication algorithm for overlap between THIN and CPRD | 2 |
| Web Figure 2 Source of heart failure diagnoses in linked primary and secondary care data (CPRD, HES, ONS) | 3 |
| Web Figure 3 Study population for subtyping analysis | 4 |
| Web figure 4. Variable importance for dimensionality reduction (n=87) | 5 |
| Web Figure 5. Comparison of Clustering Methods | 6 |
| Web figure 6. Selected continuous variables across five subtypes of individuals with incident heart failure. | 7 |
| Web figure 7. Mortality in subtypes of heart  failure by continuous variables | 8 |
| Web figure 8. Risk of non-fatal cardiovascular diseases and all-cause hospitalisation in five heart failure subtypes before or after diagnosis. | 9 |
| Web Figure 9. Rates of medication use in five heart failure subtypes ever or after diagnosis. | 10 |
| Web Table 1: Covariates included in clustering analyses (n=635)- separate Excel file | 11 |
| Web Table 2. Supplementary methods used for Heart failure subtype clustering. | 12 |
| Web Table 3 External validity: performance of four clustering methods in two UK primary care populations (CPRD and THIN) | 15 |
| Web Table 4. Heart failure single nucleotide polymorphisms (SNPs) included in analysis of biologic validity for subtypes of heart failure. | 16 |
| Web Table 5. Polygenic risk scores examined from the Polygenic Score Catalog. | 17 |
| Web Table 6. Pairwise comparisons (p-values) of survival probability of discovered subtypes in CPRD and THIN data using Log-rank test. | 18 |

**Web Figure 1 Deduplication algorithm for overlap between THIN and CPRD**


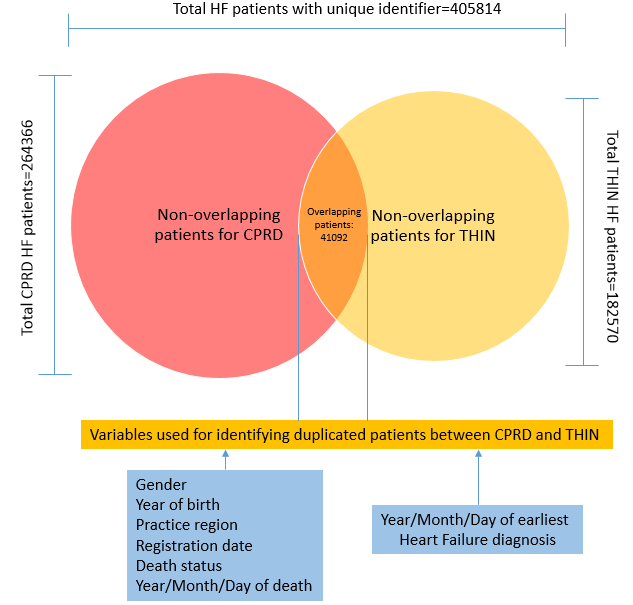


**Web Figure 2 Source of heart failure diagnoses in linked primary care (CPRD) and secondary care (HES) and cause of death (ONS) data.**


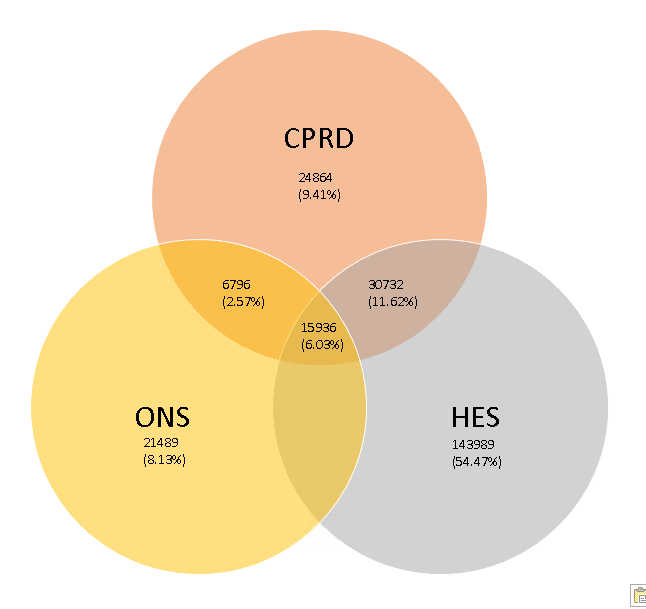


**Web Figure 3 Study population for subtyping analysis**


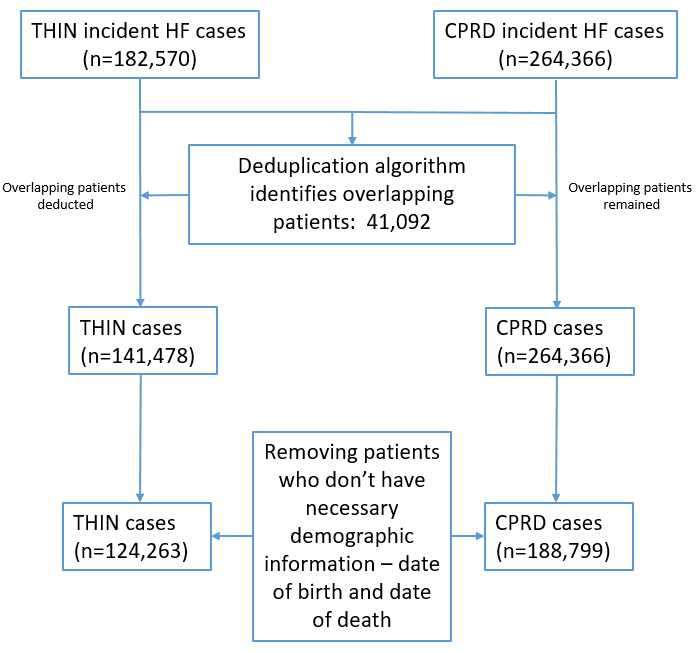


**Web figure 4. Variable importance for dimensionality reduction (n=87)**

| 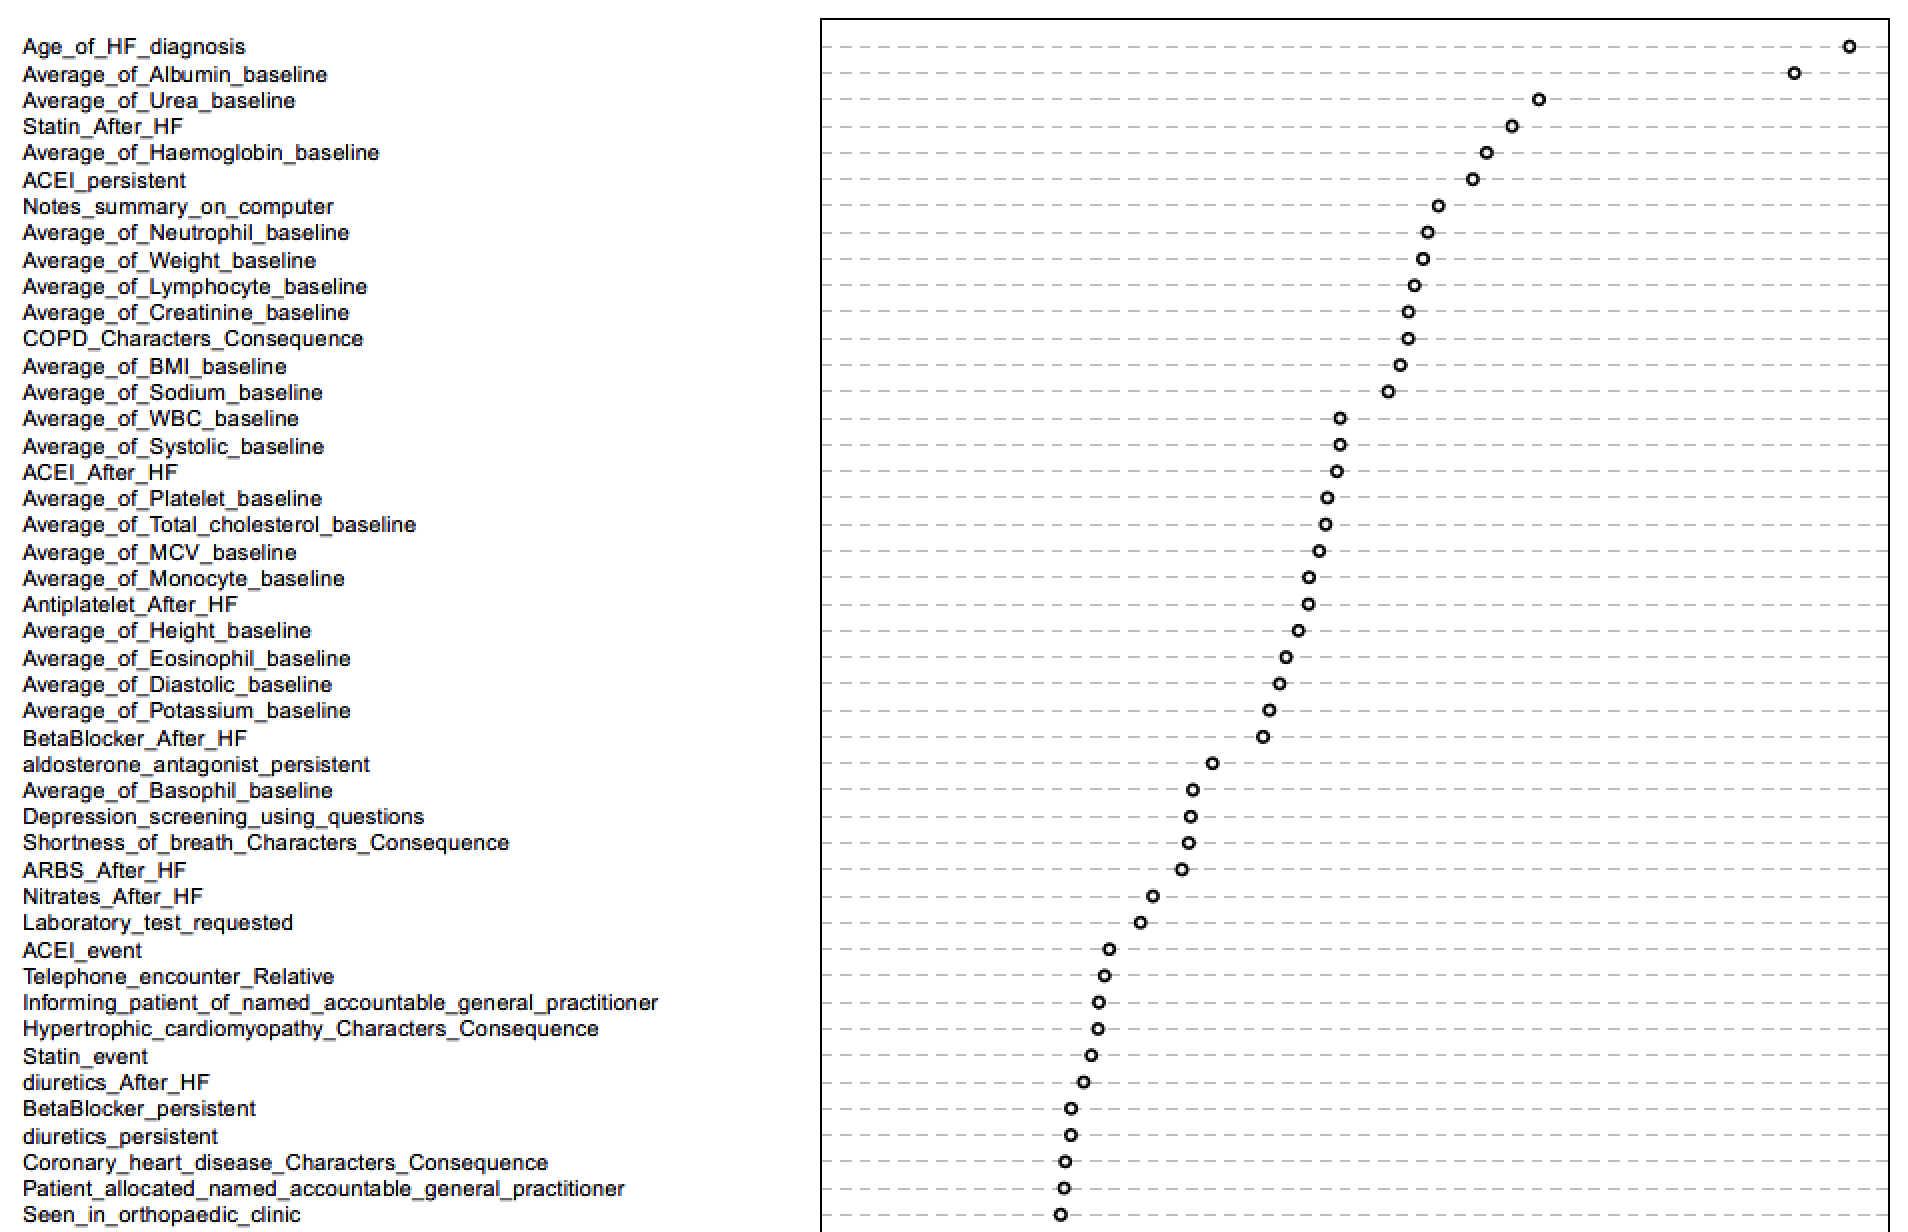 |
| --- |
| 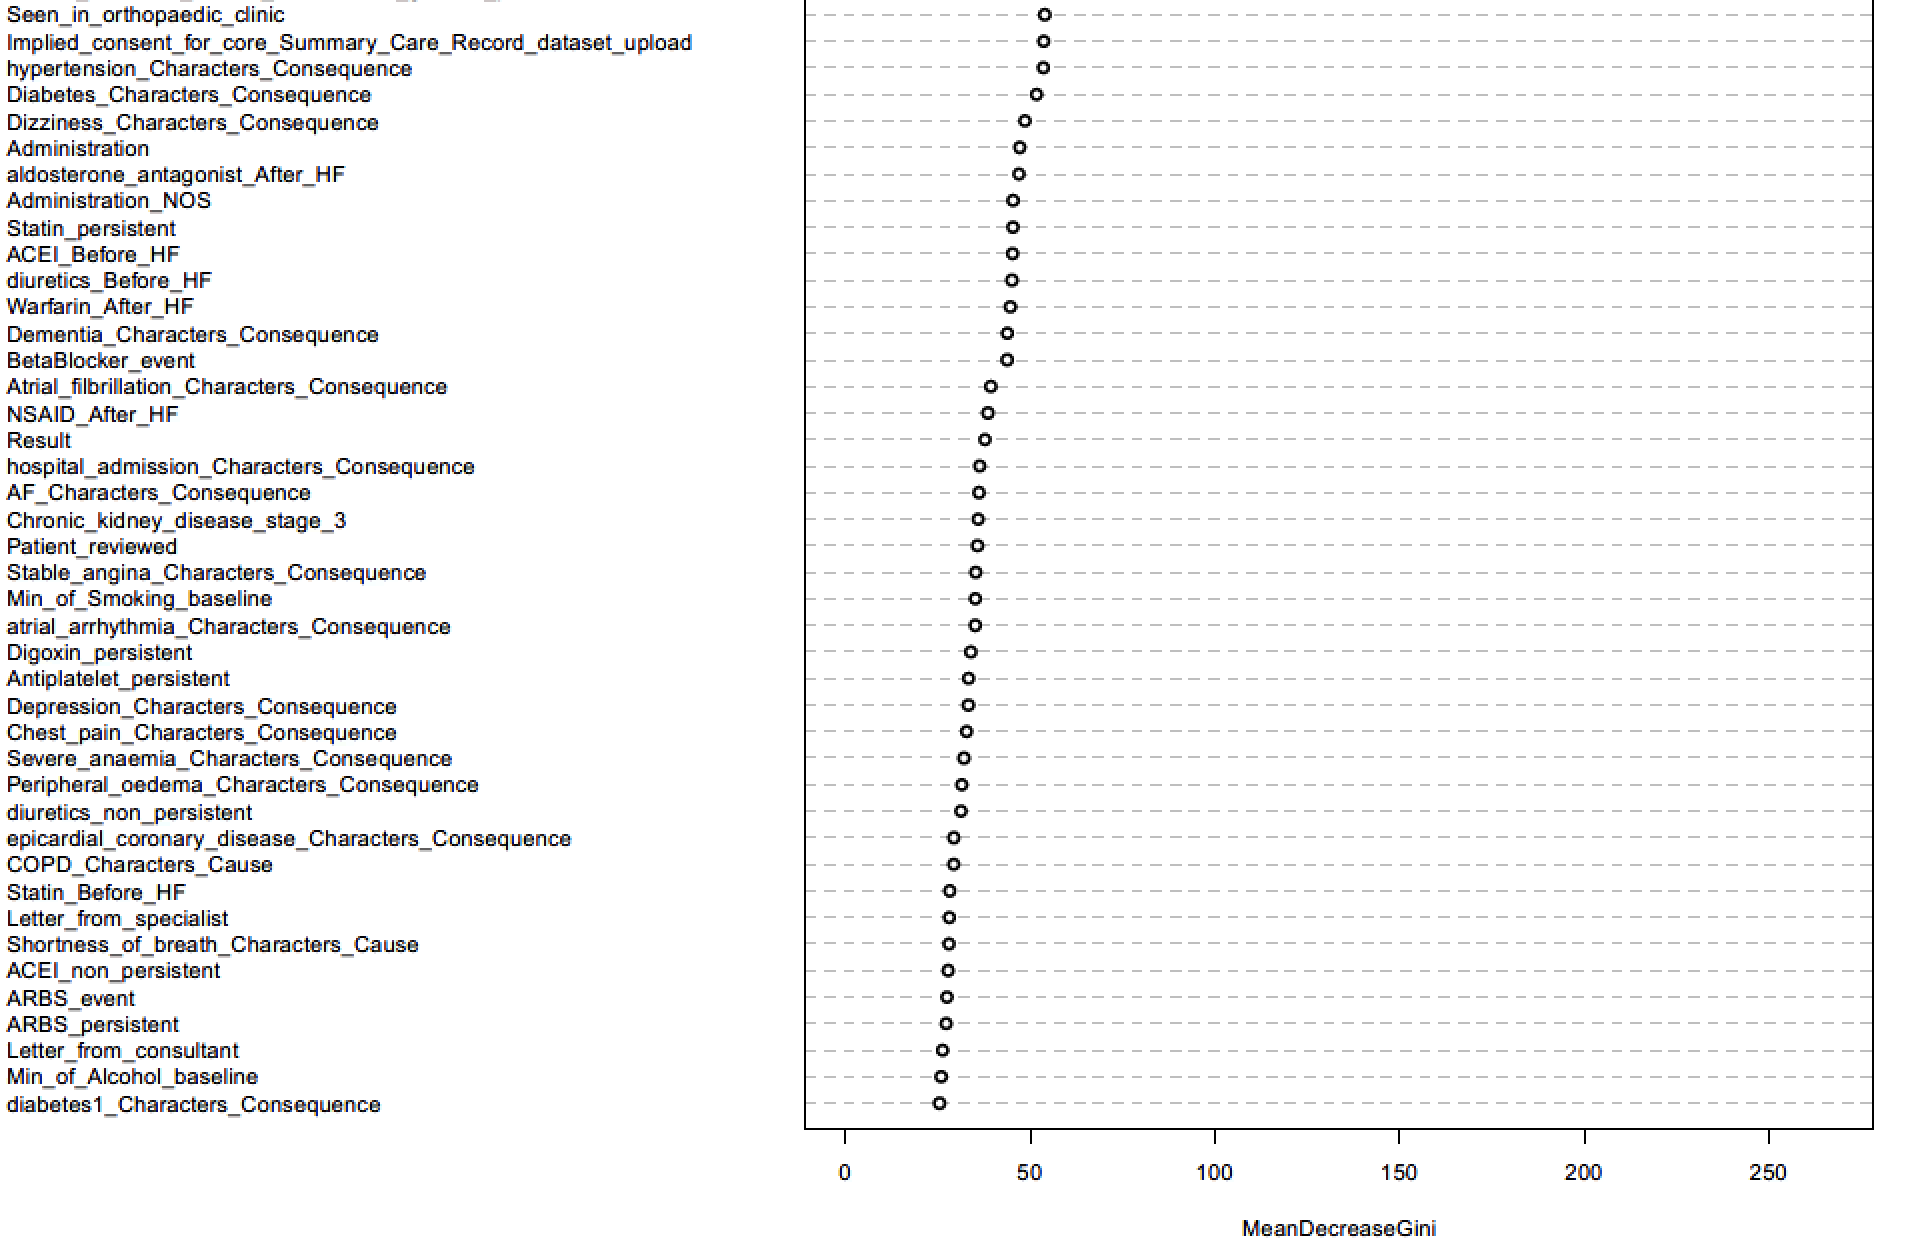 |

**Web Figure 5. Comparison of Clustering Methods**

1. **Cluster similarity metrics**


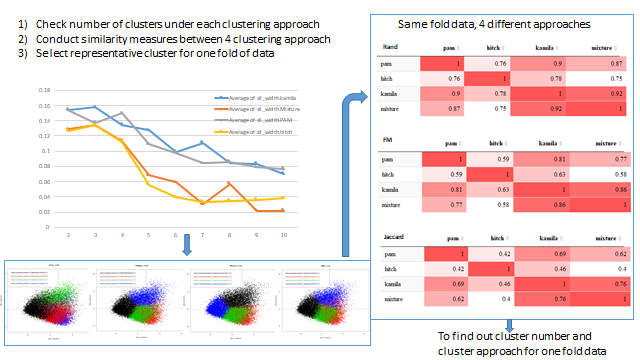


1. **Selection of representative clusters**

**Web figure 6. Selected continuous variables across five subtypes of individuals with incident heart failure.**

**Web figure 7. Mortality in subtypes of heart failure by continuous variables**

**Web figure 8. Risk of non-fatal cardiovascular diseases and all-cause hospitalisation in five heart failure subtypes before or after diagnosis.**


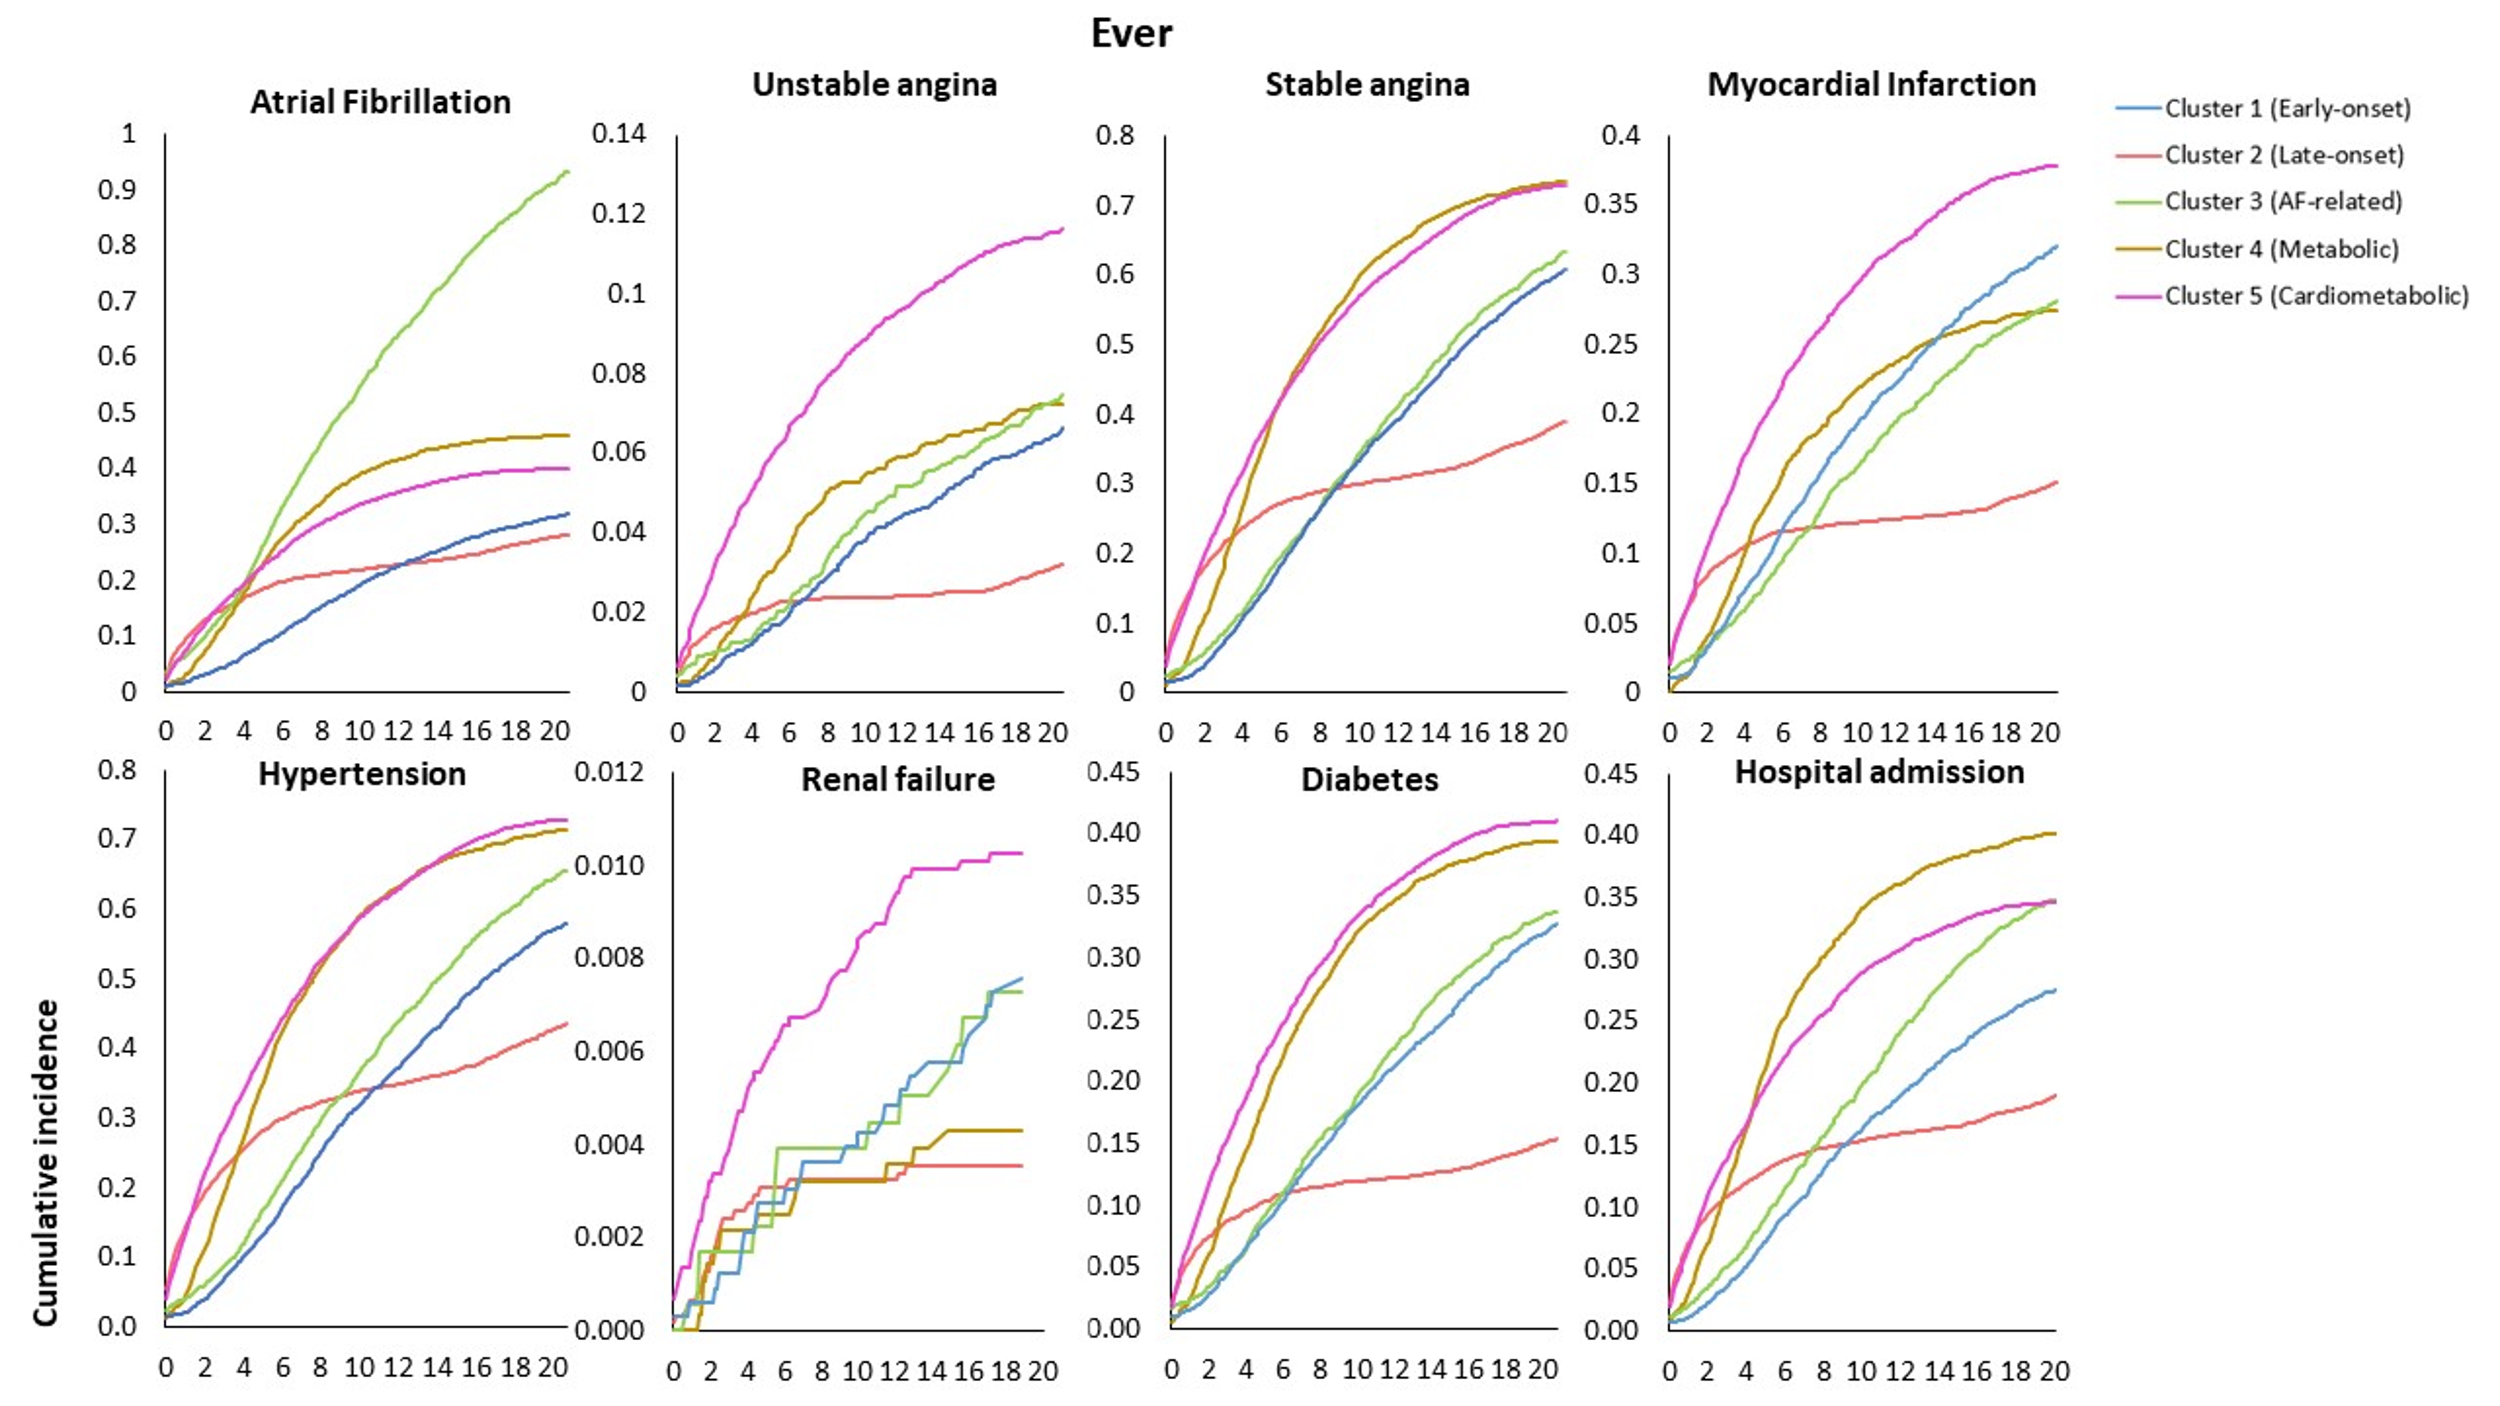


**Web Figure 9. Rates of medication use in five heart failure subtypes ever or after diagnosis.**


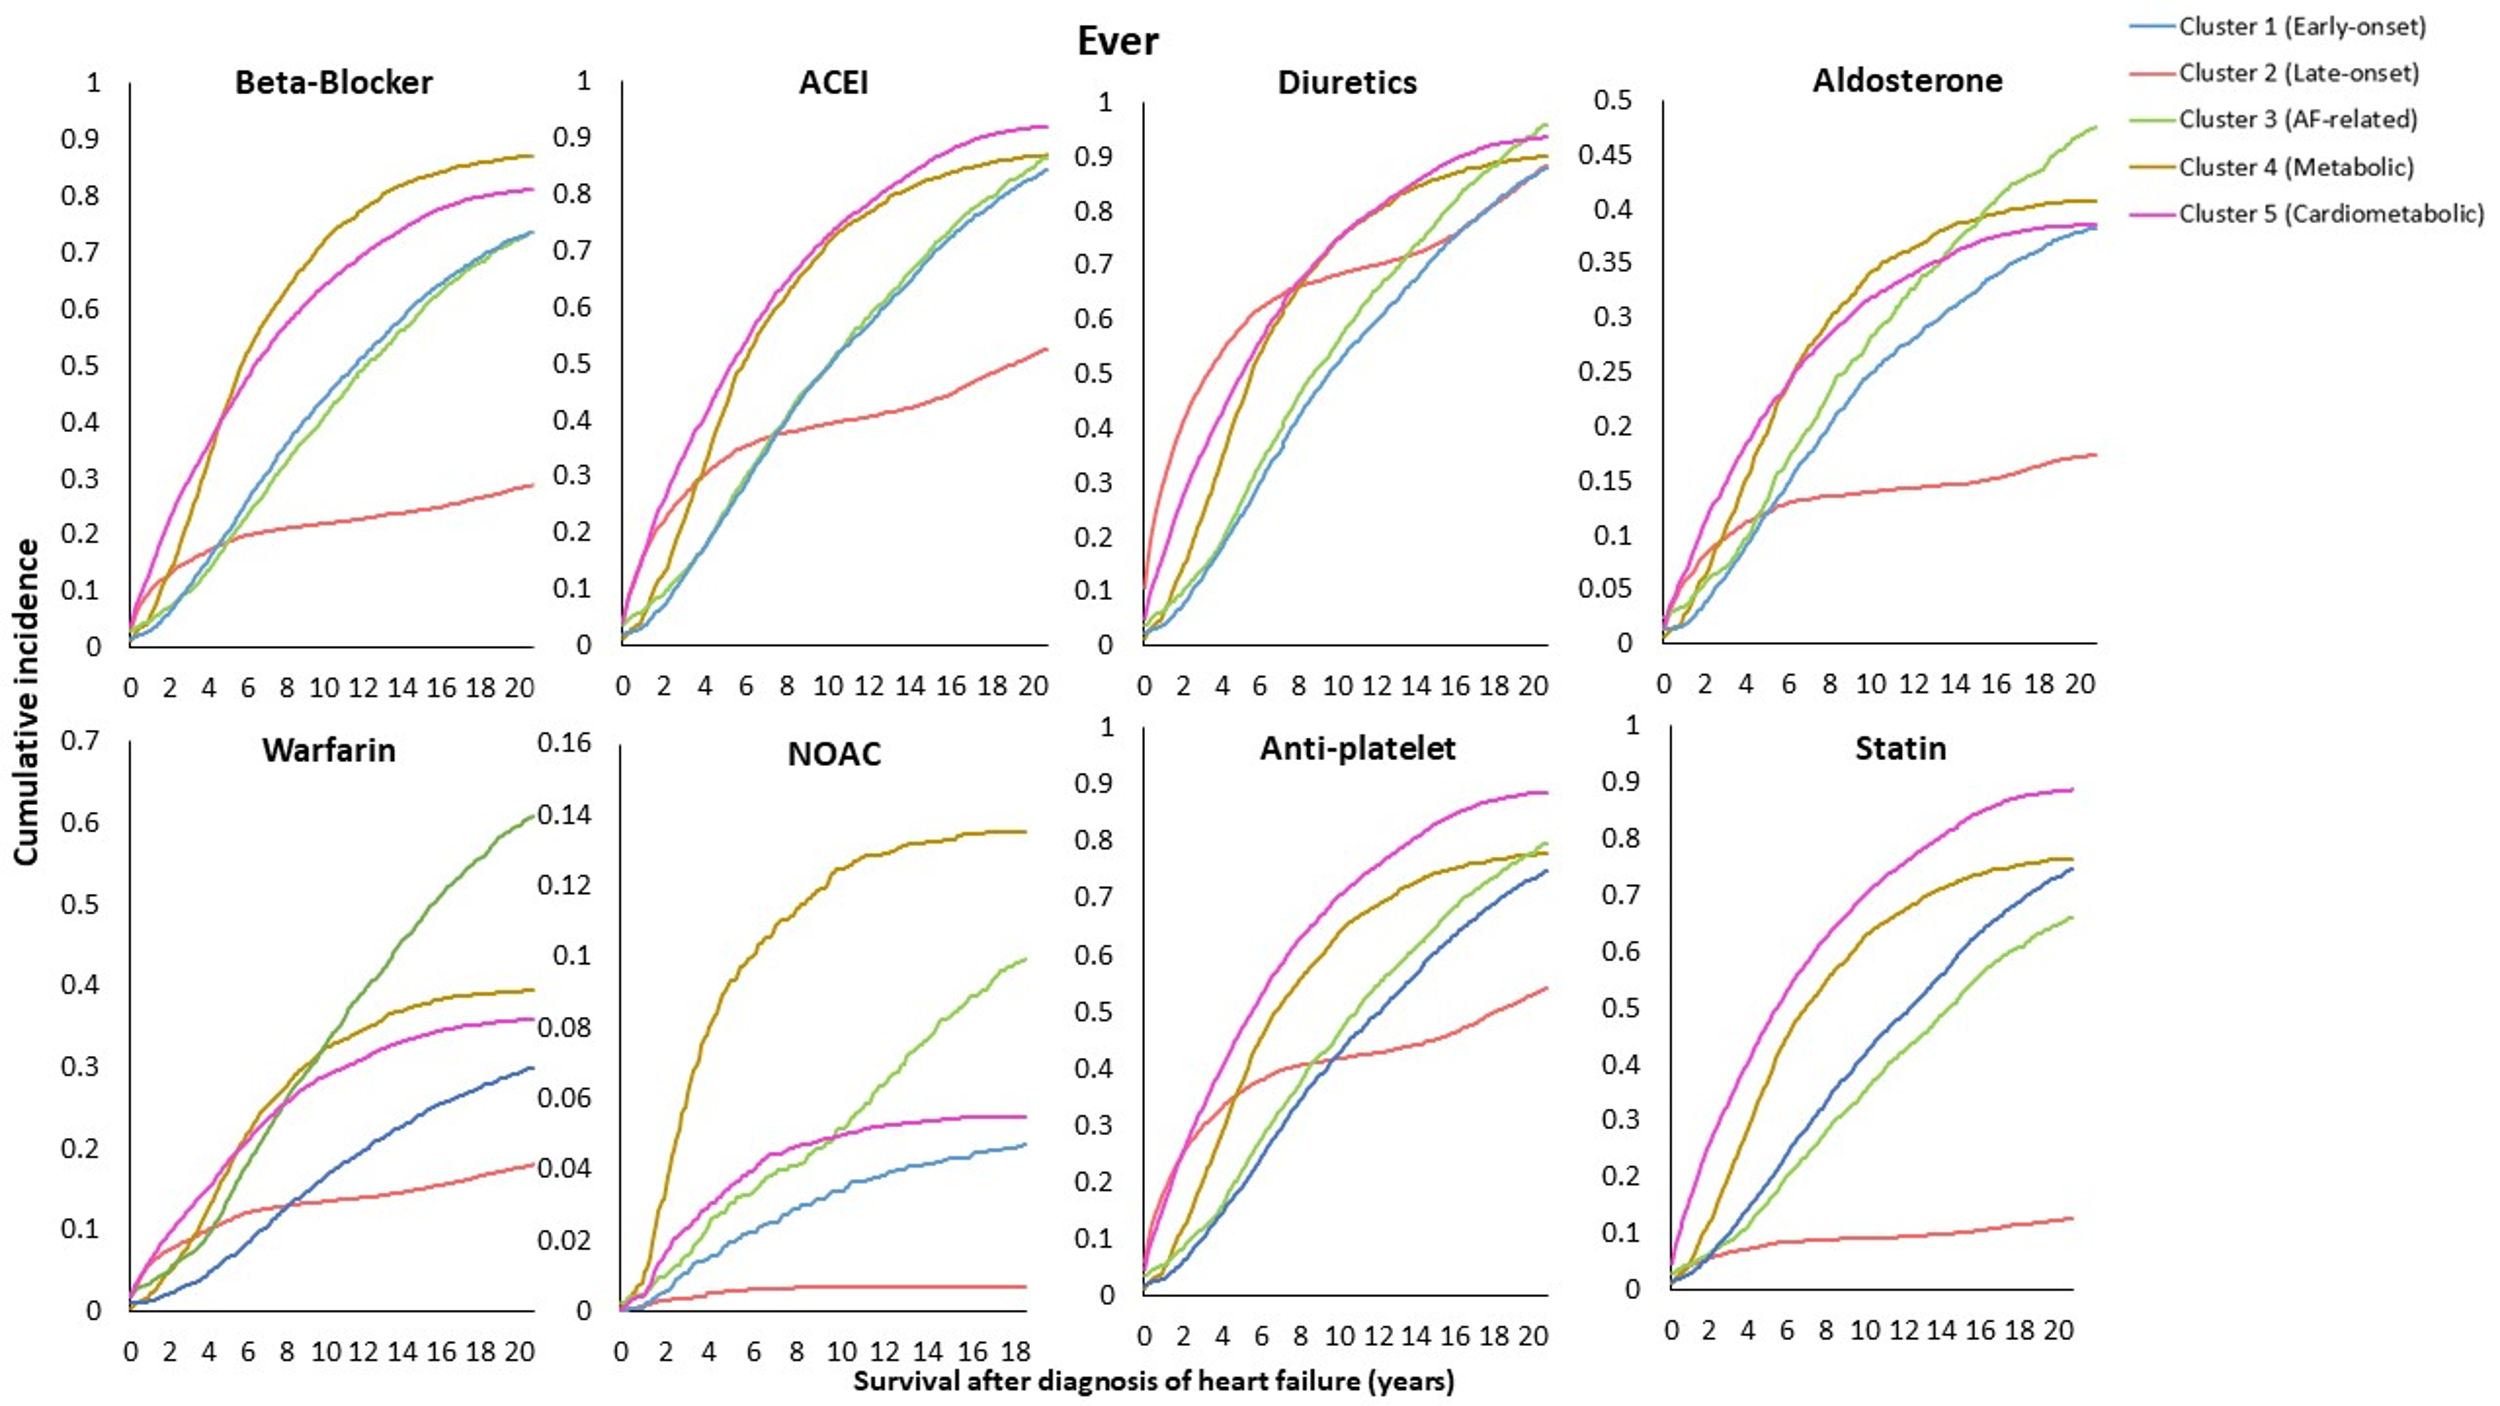


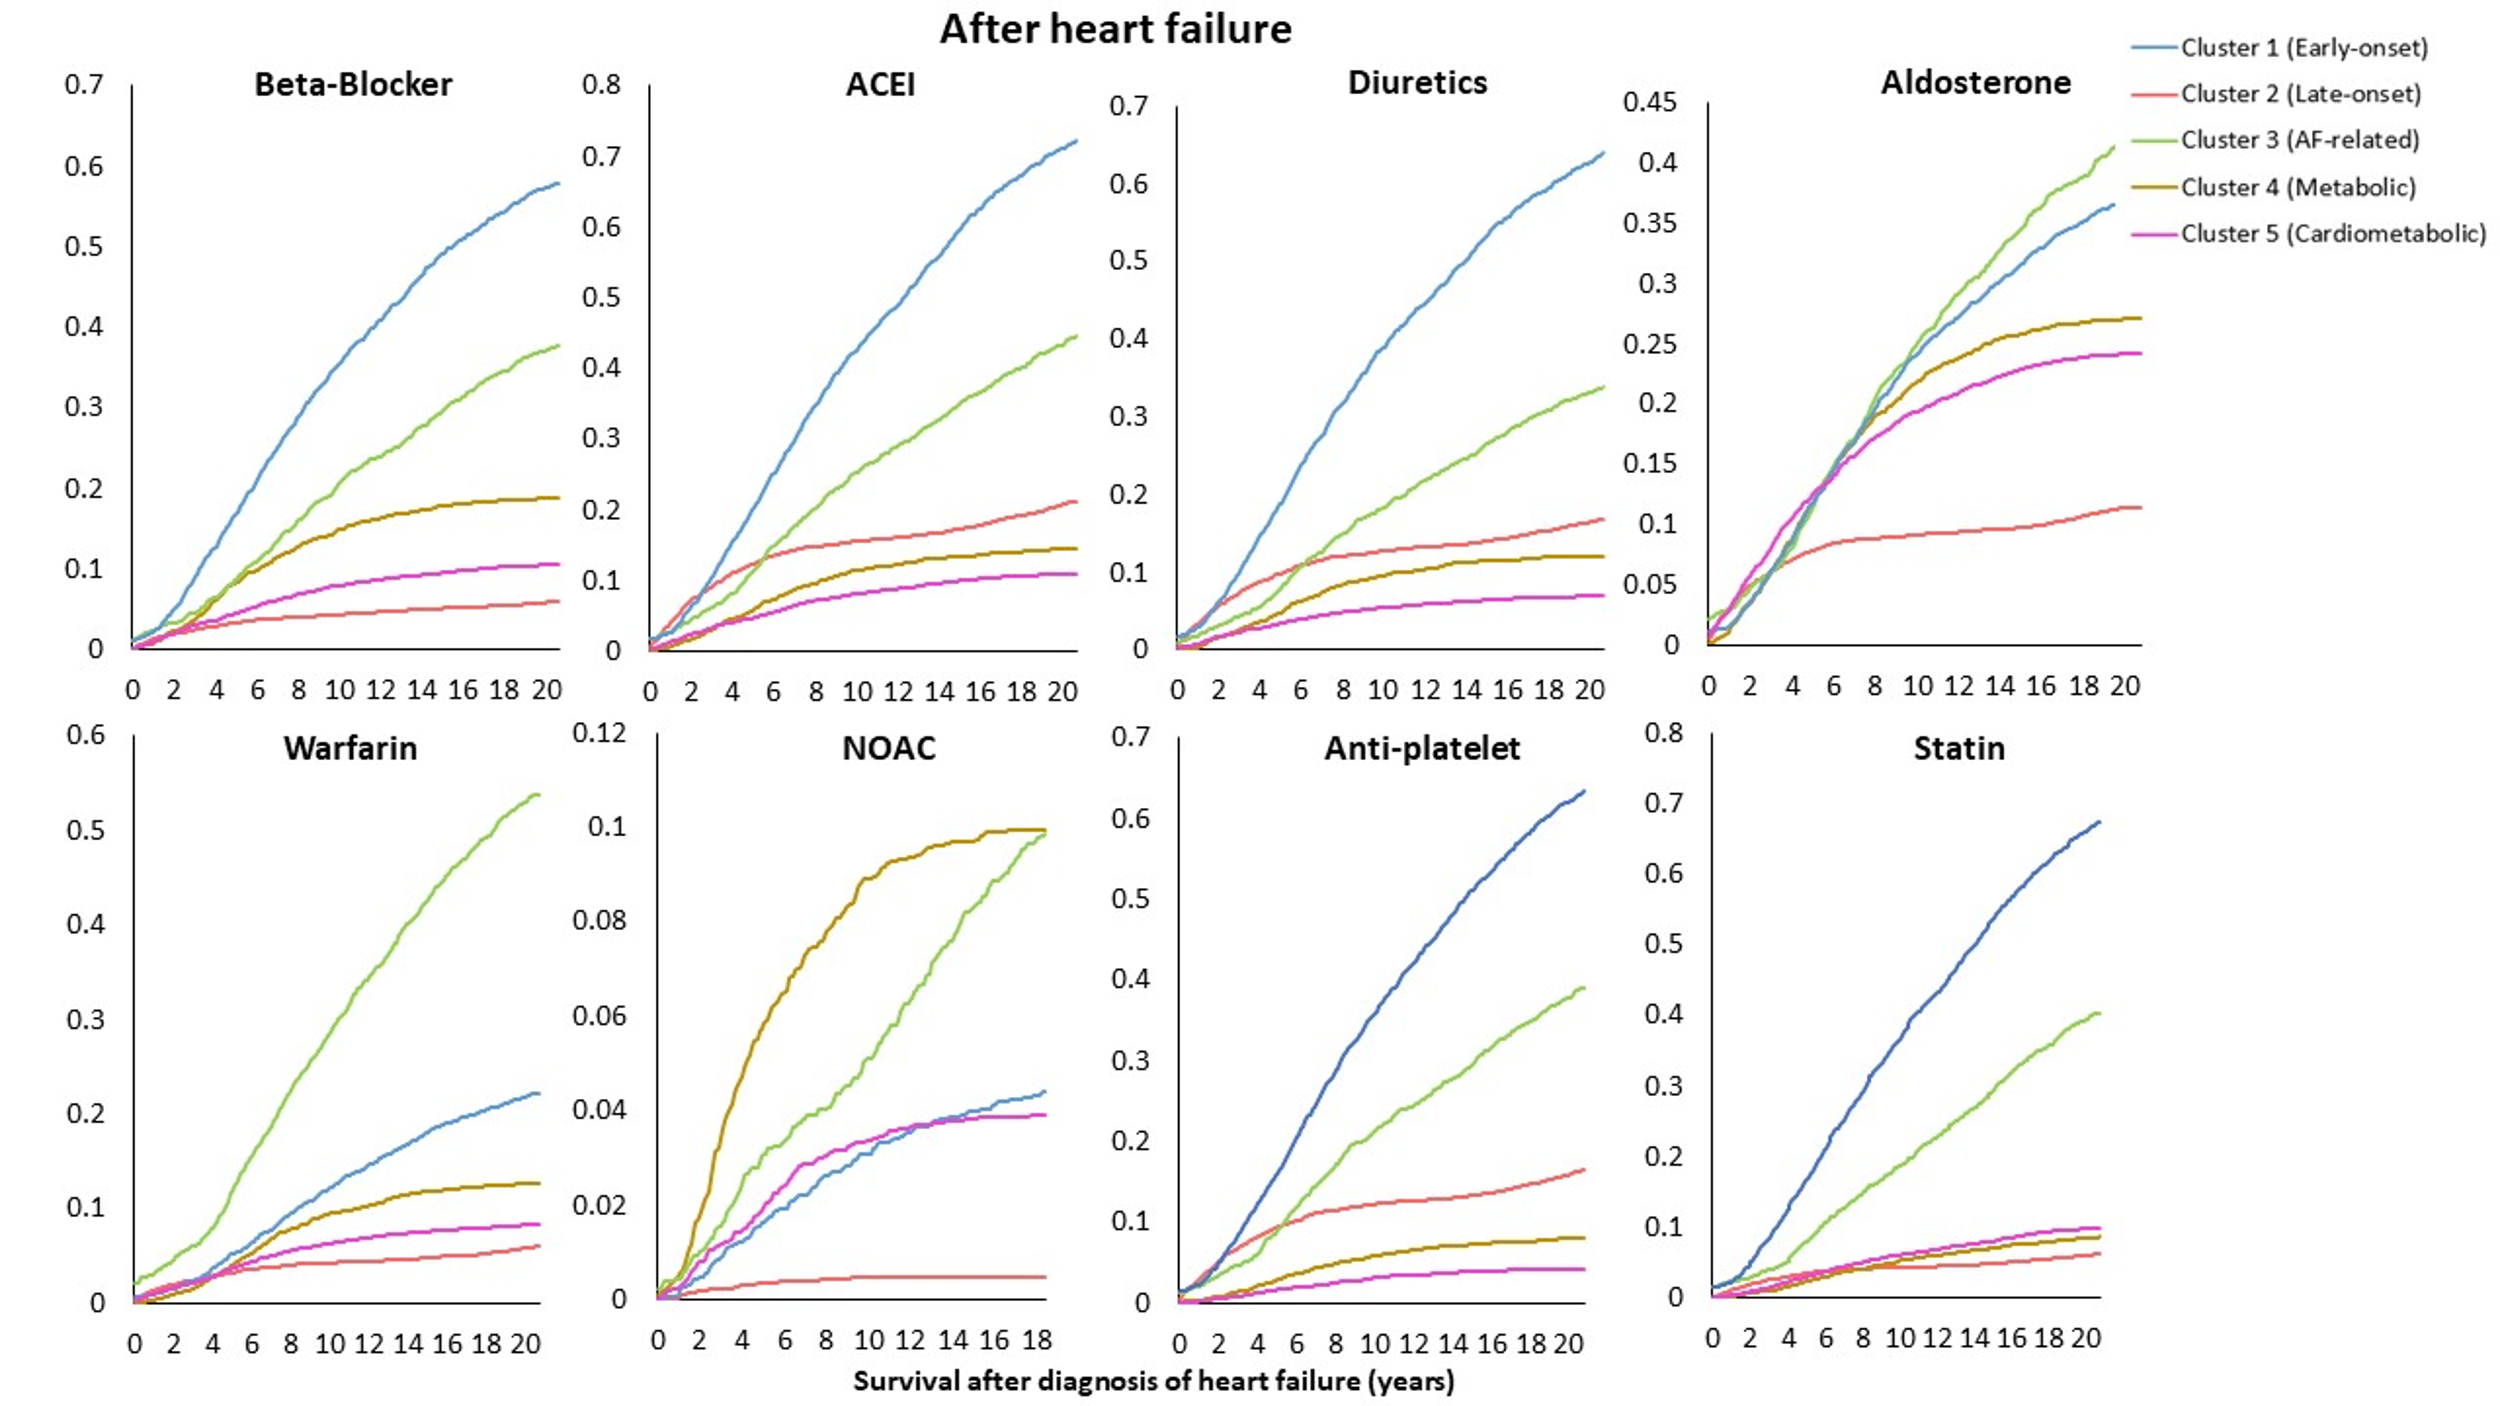


**Web Table 1: Covariates included in clustering analyses (n=635)**

**See Web Table 1 Excel attachment.**

**Web Table 2. Supplementary methods**

**Supplementary References**:

[1] https://www.caliberresearch.org/portal/codelists

[2] Audigier, V., Husson, F. & Josse, J. A principal component method to impute missing values for mixed data. Adv Data Anal Classif 10, 5–26 (2016). https://doi.org/10.1007/s11634-014-0195-1

[3] Stefano Nembrini, Inke R König, Marvin N Wright, The revival of the Gini importance?, Bioinformatics, Volume 34, Issue 21, 01 November 2018, Pages 3711–3718,

[4] Ramsay J.O., Silverman B.W. Principal components analysis of mixed data. In: Functional Data Analysis. Springer Series in Statistics. Springer, New York, NY. (1997) https://doi.org/10.1007/978-1-4757-7107-7_8

[5] Hennig, C. and Liao, T.F. How to find an appropriate clustering for mixed‐type variables with application to socio‐economic stratification. Journal of the Royal Statistical Society: Series C (Applied Statistics), 62: 309-369 (2013).

[6] Foss A, Markatou M; kamila: Clustering Mixed-Type Data in R and Hadoop. Journal of Statistical Software, 83(13), (2018).

[7] Budiaji, W.; Leisch, F. Simple K-Medoids Partitioning Algorithm for Mixed Variable Data. Algorithms 2019, 12, 177.

[8] Ranalli, M., Rocci, R. Mixture models for mixed-type data through a composite likelihood approach, Computational Statistics & Data Analysis, Volume 110, 2017, Pages 87-102, ISSN 0167-9473

[9] Tibshirani, R. and Walther, G. Cluster Validation by Prediction Strength, Journal of Computational and Graphical Statistics, 14, 511-528 (2005).

[10] Lengyel, A, Botta‐Dukát, Z. Silhouette width using generalized mean—A flexible method for assessing clustering efficiency. Ecol Evol. 2019; 9: 13231– 13243.

[11] Morlini, I., Zani, S. Dissimilarity and similarity measures for comparing dendrograms and their applications. Adv Data Anal Classif 6, 85–105 (2012).

[12] Mahini R. et al. Cluster Aggregation for Analyzing Event-Related Potentials. In: Cong F., Leung A., Wei Q. (eds) Advances in Neural Networks - ISNN 2017. ISNN 2017. Lecture Notes in Computer Science, vol 10262. Springer, Cham. https://doi.org/10.1007/978-3-319-59081-3_59

[13] Pikoula, M., Quint, J.K., Nissen, F. *et al.* Identifying clinically important COPD sub-types using data-driven approaches in primary care population based electronic health records. *BMC Med Inform Decis Mak* **19,**86 (2019). https://doi.org/10.1186/s12911-019-0805-0

[14] Bland, J.M., Altman, D.G. The logrank test. BMJ. 2004;328(7447):1073. doi:10.1136/bmj.328.7447.1073

**Web Table 3. External validation: performance of four clustering methods in two UK primary care populations (CPRD and THIN)**

**Web Table 4. Heart failure single nucleotide polymorphisms (SNPs) included in analysis of biologic validity for subtypes of heart failure.**

| **HERMES** | | | | | | | | **UKB** | | |
| --- | --- | --- | --- | --- | --- | --- | --- | --- | --- | --- |
| **CHR** | **SNP** | **POS** | **Gene Region** | **effect allele** | **other allele** | **OR (95% CI)** | **P value** | **A1*** | **A2** | **Flip UKB Dosage** |
| 1 | rs660240 | 1.1E+08 | CELSR2 | C | T | 1.06 (1.04–1.08) | 3.25E-10 | T | C | TRUE |
| 4 | rs17042102 | 1.12E+08 | PITX2, FAM241A | A | G | 1.12 (1.09–1.14) | 5.71E-20 | G | A | TRUE |
| 5 | rs11745324 | 1.37E+08 | KLHL3 | G | A | 1.05 (1.03–1.07) | 2.35E-08 | G | A | FALSE |
| 6 | rs4135240 | 36647680 | CDKN1A | T | C | 1.05 (1.03–1.07) | 6.84E-09 | T | C | FALSE |
| 6 | rs55730499 | 1.61E+08 | LPA | T | C | 1.11 (1.08–1.14) | 1.83E-11 | C | T | TRUE |
| 6 | rs140570886 | 1.61E+08 | LPA | C | T | 1.24 (1.16–1.3) | 7.69E-11 | T | C | TRUE |
| 9 | rs1556516 | 22100176 | 9p21/CDKN2B-AS1 | C | G | 1.06 (1.05–1.08) | 1.57E-15 | G | C | TRUE |
| 9 | rs600038 | 1.36E+08 | ABO, SURF1 | C | T | 1.06 (1.04–1.08) | 3.68E-09 | T | C | TRUE |
| 10 | rs4746140 | 75417249 | SYNPO2L, AGAP5 | G | C | 1.07 (1.05–1.09) | 1.10E-09 | G | C | FALSE |
| 10 | rs17617337 | 1.21E+08 | BAG3 | C | T | 1.06 (1.04–1.08) | 3.65E-09 | C | T | FALSE |
| 12 | rs4766578 | 1.12E+08 | ATXN2 | T | A | 1.04 (1.03–1.06) | 4.90E-08 | T | A | FALSE |
| 16 | rs56094641 | 53806453 | FTO | G | A | 1.05 (1.03–1.06) | 1.21E-08 | A | G | TRUE |

12 independent variants associated with HF at the genome-wide significance level (*P* < 5 × 10−8) (Shah et al 2020). A1 is the reference allele for the expected allelic dosage in UKB. Table indicates which HF SNPs will require dosages to be flipped prior to analysis.

**Web Table 5. Polygenic risk scores examined from the Polygenic Score Catalog.**

| Phenotype | PGS score ID | Number of SNPs in score | Number of score SNPs found in our sample | Percentage of all Score SNPs included in study |
| --- | --- | --- | --- | --- |
| Atrial arrhythmias | PGS000016 | 6,730,541 | 276,790 | 4.1 |
| Diabetes | PGS000014 | 6,917,436 | 282,965 | 4.1 |
| Heavy alcohol intake | PGS000201 | 1,094,954 | 140,902 | 12.9 |
| Hypertension | PGS000706 | 186,726 | 172,158 | 92.2 |
| Myocardial infarction | PGS000710 | 183,566 | 169,242 | 92.2 |
| Obesity | PGS001228 | 27,126 | 24,904 | 91.8 |
| Severe anaemia | PGS001305 | 121 | 98 | 81 |
| Smoking | PGS001129 | 974 | 832 | 85.4 |
| Stable angina | PGS000703 | 183,692 | 169,372 | 92.2 |
| Thyroid disorders | PGS001043 | 69 | 55 | 79.7 |
| Unstable angina | PGS001048 | 687 | 548 | 79.8 |

* PGS score ID is a unique identifier which can be used to lookup details of the score and how it was developed from the PGS catalog (pgscatalog.org). Number of SNPs in score, indicates how many SNPs was included in the PGS score. The last two columns show number and percentage of the score SNPs could be found in our sample, and thus used to calculate the scores with.

**Web Table 6.** Pairwise comparisons (p-values) of survival probability of discovered subtypes in CPRD and THIN data using Log-rank test.

**
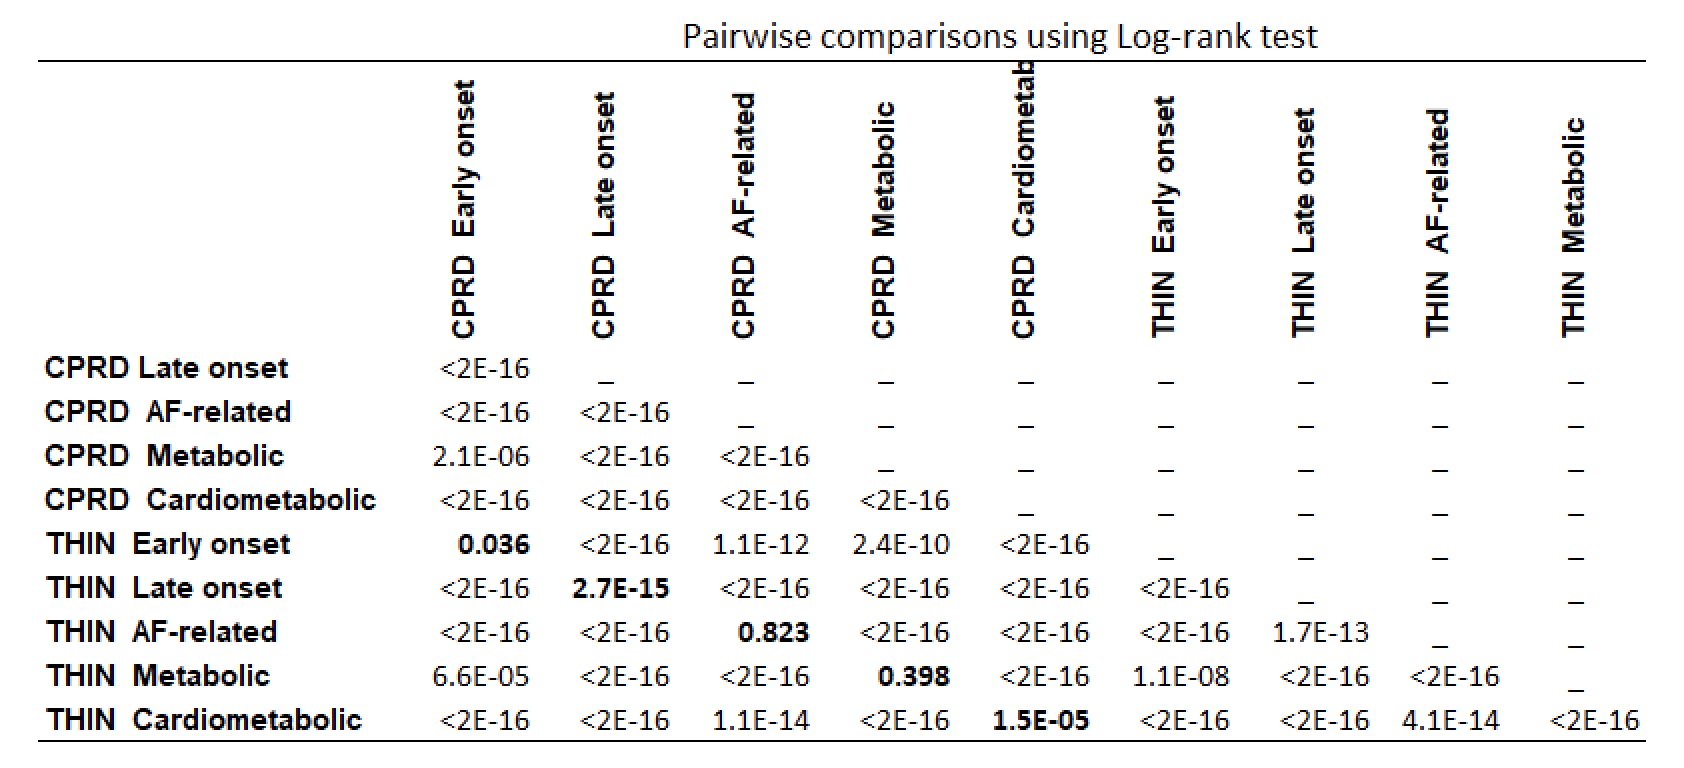
**
